# Supplementary material for: Vacuum-assisted evaporative concentration combined with LC-HRMS/MS for ultra-trace-level screening of organic micropollutants in environmental water samples
Source: PubMed Central journal article supplement (PMC6470124; doi:10.1007/s00216-019-01696-3), 2019-03-11
Supplement: 216_2019_1696_MOESM1_ESM.pdf [file 216_2019_1696_MOESM1_ESM.pdf]

**Electronic Supplementary Material**

**Vacuum-assisted evaporative concentration combined with LC-HRMS/MS for ultra-trace-level screening of organic micropollutants in environmental water samples**

Jonas Mechelke, Philipp Longrée, Heinz Singer, Juliane Hollender

Additional file available under <https://doi.org/10.1007/s00216-019-01696-3>.

# Contents

|                                                                                                       |           |
|-------------------------------------------------------------------------------------------------------|-----------|
| <b>S1 Scheme of the vacuum-assisted evaporation system and the mixed-bed multilayer SPE cartridge</b> | <b>3</b>  |
| <b>S2 Pressure gradients applied during VEC</b>                                                       | <b>4</b>  |
| <b>S3 On-column sample volume</b>                                                                     | <b>4</b>  |
| <b>S4 Chromatographic gradient</b>                                                                    | <b>4</b>  |
| <b>S5 Formation of precipitates</b>                                                                   | <b>5</b>  |
| <b>S6 Non-target screening</b>                                                                        | <b>6</b>  |
| 6.1 Compound Discoverer 2.1 – Workflow details                                                        | 6         |
| 6.2 Applicability of VEC to non-target screenings                                                     | 8         |
| <b>S7 Chromatography of selected polar analytes and their</b>                                         | <b>8</b>  |
| 7.1 Polar analytes <u>exclusively</u> amenable to enrichment by VEC <u>from NPW</u>                   | 9         |
| 7.2 Polar analyte <u>exclusively</u> amenable to enrichment by VEC from <u>NPW and few matrices</u>   | 10        |
| 7.3 Polar analytes <u>exclusively</u> amenable to enrichment by VEC from <u>all tested matrices</u>   | 11        |
| 7.4 Polar analytes <u>especially</u> amenable to enrichment by VEC compared to SPE                    | 12        |
| <b>References</b>                                                                                     | <b>16</b> |

**S1 Scheme of the vacuum-assisted evaporation system and the mixed-bed multilayer SPE cartridge**

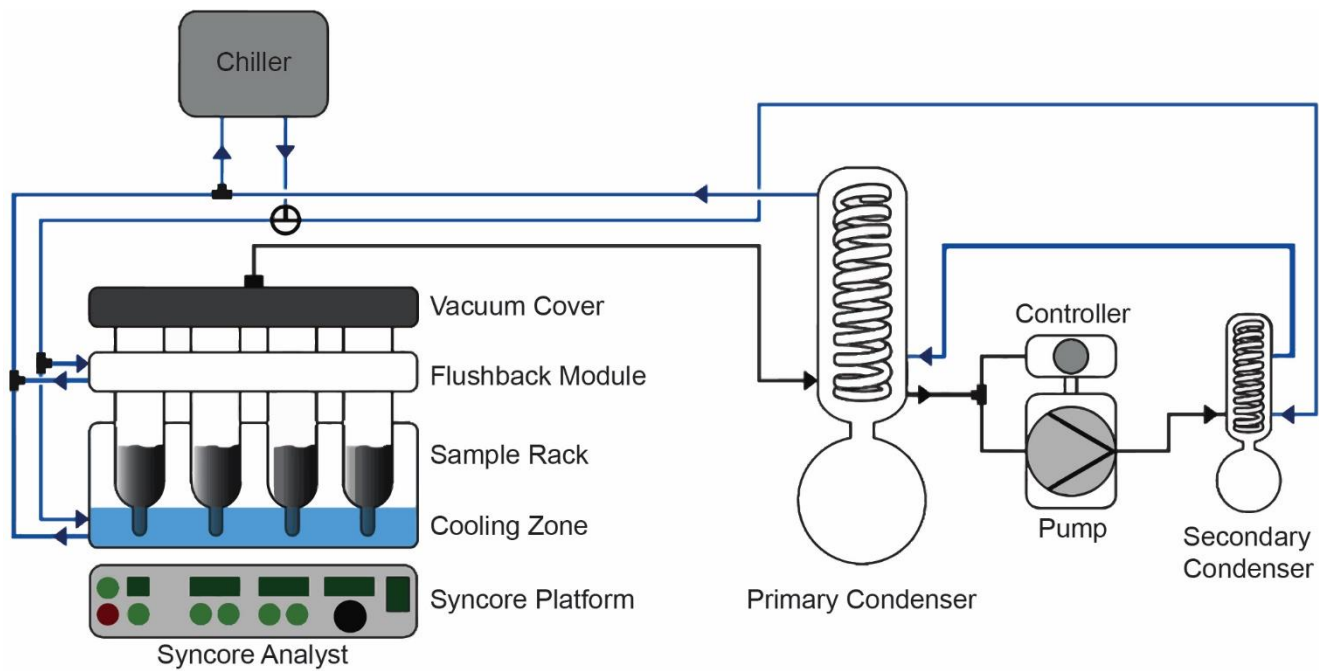

**Fig. S1** Schematic setup of the vacuum-assisted evaporation system (Syncore Analyst, BÜCHI Labortechnik AG, Switzerland) including the vacuum pump and the chiller. *Blue lines*: cooling water loop [1]

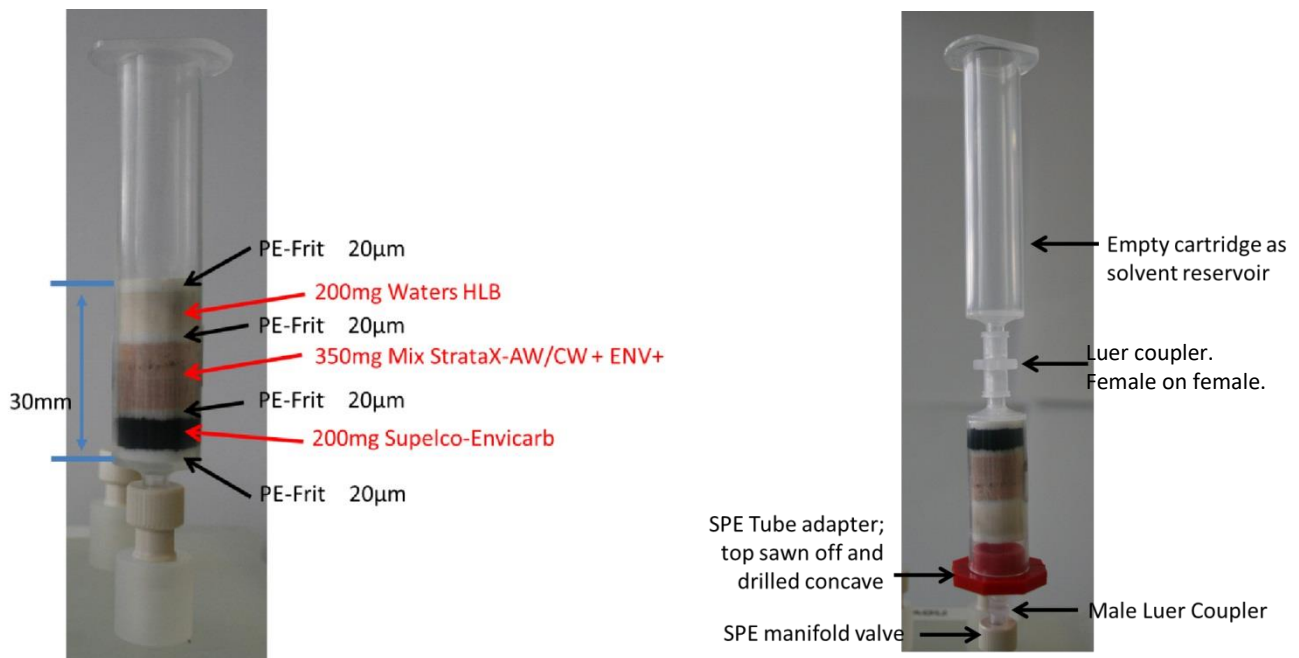

**Fig. S2** Packed mixed-bed multilayer SPE cartridge. *Left*: loading position. *Right*: cut-off cartridge for upside-down elution (back flush). *Photo credit*: Bernadette Vogler (Eawag)

## S2 Pressure gradients applied during VEC

**Table S1** Pressure (p) gradient for the automated (largely unattended) vacuum-assisted evaporative concentration of 60 mL (*left*) or 6 and 15 mL (*right*) aqueous sample

| Step | p start [mbar] | p end [mbar] | duration [min] | Step | p start [mbar] | p end [mbar] | duration [min] |
|------|----------------|--------------|----------------|------|----------------|--------------|----------------|
| 1    | 1000           | 150          | 3              | 1    | 1000           | 150          | 3              |
| 2    | 150            | 92           | 3              | 2    | 150            | 92           | 3              |
| 3    | 92             | 58           | 4              | 3    | 92             | 58           | 4              |
| 4    | 58             | 58           | 5              | 4    | 58             | 58           | 5              |
| 5    | 58             | 40           | 3              | 5    | 58             | 40           | 3              |
| 6    | 40             | 40           | 5              | 6    | 40             | 40           | 5              |
| 7    | 40             | 35           | 2              | 7    | 40             | 35           | 2              |
| 8    | 35             | 30           | 2              | 8    | 35             | 30           | 2              |
| 9    | 30             | 25           | 3              | 9    | 30             | 25           | 3              |
| 10   | 25             | 20           | 3              | 10   | 25             | 20           | 3              |
| 11   | 20             | 20           | 210            | 11   | 20             | 20           | 50             |

## S3 On-column sample volume

**Table S2** Overview on enrichment factors (EF), sample volume ( $V_s$ ), final volume of concentrate ( $V_c$ ), injection volume (IV), and the resulting on-column sample volume ( $V_{\text{on-column}}$ )

| Matrix | SPE        |            |      |         | VEC        |            |      |         | $V_{\text{on-column}}$ [mL] |
|--------|------------|------------|------|---------|------------|------------|------|---------|-----------------------------|
|        | $V_s$ [mL] | $V_c$ [mL] | EF   | IV [mL] | $V_s$ [mL] | $V_c$ [mL] | EF   | IV [mL] |                             |
| NPW    | 1000       |            | 1000 |         | 60         |            | 150  |         | 15                          |
| SW     | 1000       |            | 1000 |         | 60         |            | 150  |         | 15                          |
| EWW    | 250        | 1          | 250  | 0.015   | 15         | 0.4        | 37.5 | 0.1     | 3.75                        |
| IWW    | 100        |            | 100  |         | 6          |            | 15   |         | 1.5                         |

## S4 Chromatographic gradient

**Table S3** Chromatographic gradient. *Eluent A*: NANOpure™ water acidified with 0.1% formic acid. *Eluent B*: methanol acidified with 0.1% formic acid

| Time | Eluent A% | Eluent B% | Flow rate [mL/min] | Detection |
|------|-----------|-----------|--------------------|-----------|
| 0    | 95        | 5         |                    |           |
| 1.5  | 95        | 5         |                    |           |
| 17.5 | 5         | 95        | 0.3                | yes       |
| 25   | 5         | 95        |                    |           |
| 25.5 | 95        | 5         |                    |           |
| 29.5 | 95        | 5         | 0.3                | no        |

## S5 Formation of precipitates

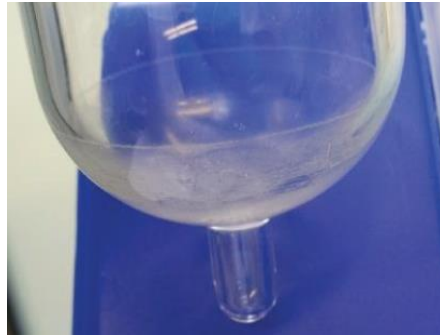

**Fig. S3** Matrix precipitates after VEC exemplarily shown for effluent wastewater (enrichment factor: 20) during a preliminary experiment

## S6 Non-target screening

### 6.1 Compound Discoverer 2.1 – Workflow details

The Compound Discoverer 2.1 (Thermo Scientific, USA) workflow is presented in Fig. S4. Detailed parameter settings are shown in Table S4.

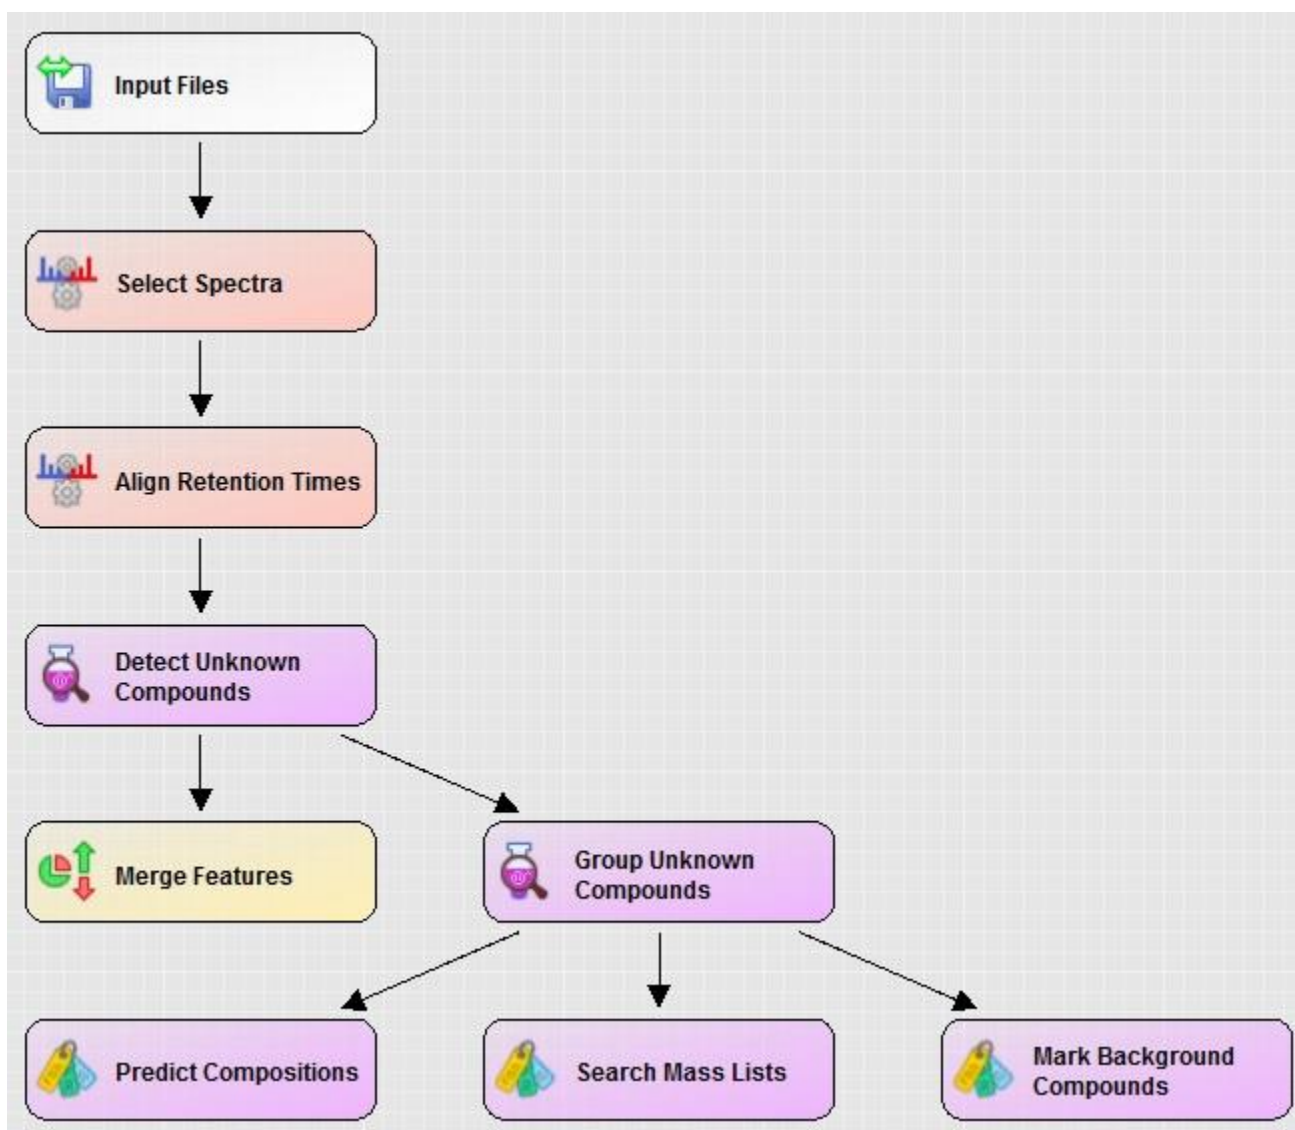

Fig. S4 Compound Discoverer 2.1 workflow diagram

**Table S4** Compound Discoverer 2.1 workflow parameters

| Processing Node           | Applied Parameter Settings                                                                                                                                                                                                                                                                                                                                  |
|---------------------------|-------------------------------------------------------------------------------------------------------------------------------------------------------------------------------------------------------------------------------------------------------------------------------------------------------------------------------------------------------------|
| Select Spectra            | Presettings                                                                                                                                                                                                                                                                                                                                                 |
|                           | Polarity mode: + (pos batch), - (neg batch)                                                                                                                                                                                                                                                                                                                 |
|                           | Unrecognized Polarity Replacements: + (pos batch), - (neg batch)                                                                                                                                                                                                                                                                                            |
| Align Retention Times     | Alignment Model: Adaptive curve                                                                                                                                                                                                                                                                                                                             |
|                           | Maximum Shift: 0.75 min                                                                                                                                                                                                                                                                                                                                     |
|                           | Mass Tolerance: 5 ppm                                                                                                                                                                                                                                                                                                                                       |
| Detect Unknown Compounds  | Mass Tolerance: 5 ppm                                                                                                                                                                                                                                                                                                                                       |
|                           | Intensity Tolerance: 30%                                                                                                                                                                                                                                                                                                                                    |
|                           | S/N Threshold: 3                                                                                                                                                                                                                                                                                                                                            |
|                           | Min Peak Intensity: 10000                                                                                                                                                                                                                                                                                                                                   |
|                           | Preferred ions: pos ESI mode: [2M+H] <sup>+</sup> +1; [M+2H] <sup>+</sup> +2; [M+DMSO+H] <sup>+</sup> +1; [M+H] <sup>+</sup> +1; [M+K] <sup>+</sup> +1; [M+Na] <sup>+</sup> +1; [M+NH <sub>4</sub> ] <sup>+</sup> +1; neg ESI mode: [2M-H] <sup>-</sup> -1; [M+Cl] <sup>-</sup> -1; [M+FA-H] <sup>-</sup> -1; [M-2H] <sup>-</sup> -2; [M-H] <sup>-</sup> -1 |
|                           | Min Element Counts: C H                                                                                                                                                                                                                                                                                                                                     |
|                           | Max Element Counts: C90 H190 Br3 Cl4 F6 K2 N10 Na2 O18 P3 S5                                                                                                                                                                                                                                                                                                |
| Group Unknown Compounds   | Mass Tolerance: 5 ppm                                                                                                                                                                                                                                                                                                                                       |
|                           | RT Toerance: 0.75 min                                                                                                                                                                                                                                                                                                                                       |
|                           | Preferred ions: pos ESI mode: [2M+H] <sup>+</sup> +1; [M+2H] <sup>+</sup> +2; [M+DMSO+H] <sup>+</sup> +1; [M+H] <sup>+</sup> +1; [M+K] <sup>+</sup> +1; [M+Na] <sup>+</sup> +1; [M+NH <sub>4</sub> ] <sup>+</sup> +1; neg ESI mode: [2M-H] <sup>-</sup> -1; [M+Cl] <sup>-</sup> -1; [M+FA-H] <sup>-</sup> -1; [M-2H] <sup>-</sup> -2; [M-H] <sup>-</sup> -1 |
| Search mzCloud            | Compound Classes: All                                                                                                                                                                                                                                                                                                                                       |
|                           | Match Ion Activation Type: True                                                                                                                                                                                                                                                                                                                             |
|                           | Match Ion Activation Energy: Match with Tolerance                                                                                                                                                                                                                                                                                                           |
|                           | Ion Activation Energy Tolerance: 30                                                                                                                                                                                                                                                                                                                         |
|                           | Apply Intensity Threshold: True                                                                                                                                                                                                                                                                                                                             |
|                           | Identity Search: HighChem HighRes                                                                                                                                                                                                                                                                                                                           |
|                           | Similarity Search: Similarity Forward                                                                                                                                                                                                                                                                                                                       |
|                           | Match Factor Threshold: 60                                                                                                                                                                                                                                                                                                                                  |
| Mark Background Compounds | Max. Sample/Blanks: 3                                                                                                                                                                                                                                                                                                                                       |
|                           | Max. Blank/Samples: 0                                                                                                                                                                                                                                                                                                                                       |
|                           | Hide Background: FALSE                                                                                                                                                                                                                                                                                                                                      |
| Search Mass Lists         | Input files: \BU_VAL_ILISmasslist.csv                                                                                                                                                                                                                                                                                                                       |
|                           | Consider Retention Time: True                                                                                                                                                                                                                                                                                                                               |
|                           | RT tolerance: 2                                                                                                                                                                                                                                                                                                                                             |
|                           | Mass Tolerance: 5 ppm                                                                                                                                                                                                                                                                                                                                       |
| Predict Compositions      | Mass Tolerance: 5 ppm                                                                                                                                                                                                                                                                                                                                       |
|                           | Min. Element Counts: C H                                                                                                                                                                                                                                                                                                                                    |
|                           | Max Element Counts: C90 H190 Br3 Cl4 F6 N10 O18 P3 S5                                                                                                                                                                                                                                                                                                       |
|                           | Min. RDBE: 0                                                                                                                                                                                                                                                                                                                                                |
|                           | Max. RDBE: 40                                                                                                                                                                                                                                                                                                                                               |
|                           | Min. H/C: 0.1                                                                                                                                                                                                                                                                                                                                               |
|                           | Max H/C: 3.5                                                                                                                                                                                                                                                                                                                                                |
|                           | Max. # Candidates: 10                                                                                                                                                                                                                                                                                                                                       |
|                           | Intensity Tolerance: 30 %                                                                                                                                                                                                                                                                                                                                   |
|                           | Intensity Threshold: 0.1 %                                                                                                                                                                                                                                                                                                                                  |
|                           | S/N Threshold: 3                                                                                                                                                                                                                                                                                                                                            |
|                           | Use Dynamic Recalibration: True                                                                                                                                                                                                                                                                                                                             |
|                           | Use Fragments Matching: True                                                                                                                                                                                                                                                                                                                                |
|                           | Mass Tolerance: 10 ppm                                                                                                                                                                                                                                                                                                                                      |
|                           | S/N Threshold: 3                                                                                                                                                                                                                                                                                                                                            |

## 6.2 Applicability of VEC to non-target screenings

Unknown compounds in effluent wastewater (EWW) samples were analyzed analogous to unknown compounds in IWW samples. Since the median ionization suppression was less pronounced in SPE extracts (28%) compared to VEC concentrates (55%), a fair comparison was not possible. Nevertheless, the respective compound numbers are presented in Table S5. The difference in ionization suppression was even greater for SW (VEC: 74%, SPE: 34%).

**Table S5** Compound numbers in EWW and IWW after enrichment via VEC and SPE

| <b>Total compounds</b>                                 | <b>VEC EWW</b> | <b>SPE EWW</b> | <b>VEC IWW</b> | <b>SPE IWW</b> |
|--------------------------------------------------------|----------------|----------------|----------------|----------------|
|                                                        | 24'909         | 36'334         | 27,637         | 42,290         |
| Compounds after blank subtraction                      | 20'780         | 29'337         | 23,777         | 35,374         |
| Unique compounds                                       | 12'742         | 21'706         | 15,541         | 27,518         |
| Heteroatom content (among total compounds)             | 79%            | 79%            | 73%            | 70%            |
| Heteroatom content (among unique compounds)            | 82%            | 79%            | 76%            | 71%            |
| Unique compounds in polar chemical space (RT ≤ 12 min) | 49%            | 39%            | 47%            | 38%            |

## S7 Chromatography of selected polar analytes and their

The following sections depict extracted-ion chromatograms (XICs, signal intensity versus retention time) of polar analytes ( $\log D_{\text{OW}, \text{pH}7} \leq 1$ ,  $\text{RT} \leq 12$  min) that were either exclusively recovered by VEC from NPW (section 7.1), by VEC from NPW and few but not all tested matrices (section 7.2), by VEC from all tested matrices (section 7.3) or polar analytes that were especially amenable to enrichment by VEC compared to SPE (all matrices, section 7.4). In the top margins, the values refer to analyte concentrations in ng/L, SWW, EWW and IWW refer to environmental samples to which the VEC workflow was applied for analyte quantification, i.e. surface water, wastewater effluent and wastewater influent, respectively, and R1 to R3 in the left margin indicate sample replicates. In each row, the first three XICs show the analyte signal in NPW (i) at the highest calibration level (1000 ng/L), (ii) in the matrix blank ('0' ng/L, only IS were added) and (iii) at the limit of quantification (LOQ). The LOQ in NPW was determined as the lowest analyte concentration yielding a chromatographic peak of at least three data points in full-scan mode, with a signal-to-noise ratio greater or equal to 10, among at least two of three replicates, and a STD-to-IS peak area response ratio (RR) of at least twice the RR in the matrix blank. Y-axes were scaled to the respective analyte signal intensity. In case of multiple chromatographic peaks, the correct peak is indicated by an arrow. Molecular structures in sections 7.1 and 7.2 were created using MarvinSketch (version 18.8.0, ChemAxon) as part of the Jchem for Excel plugin (version 18.8.0.253, ChemAxon).



## 7.1 Polar analytes exclusively amenable to enrichment by VEC from NPW

### D-lactitol

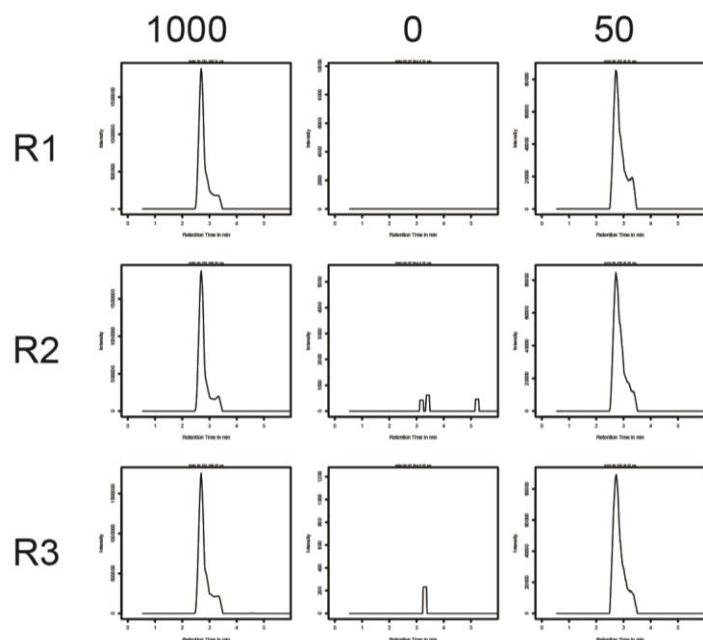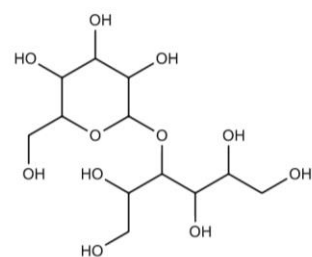

lactitol  
logD -5.5, RT 2.8 min

### 2-amino-1,5-naphthalenedisulfonic acid

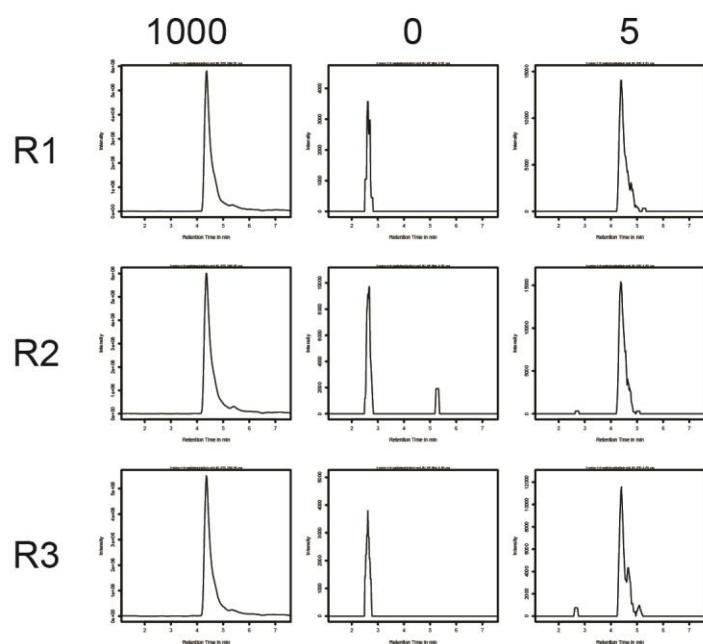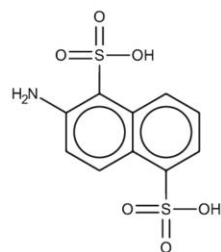

2-amino-1,5-naphthalenedisulfonic acid  
logD -4.3, RT 4.4 min

## acamprosat

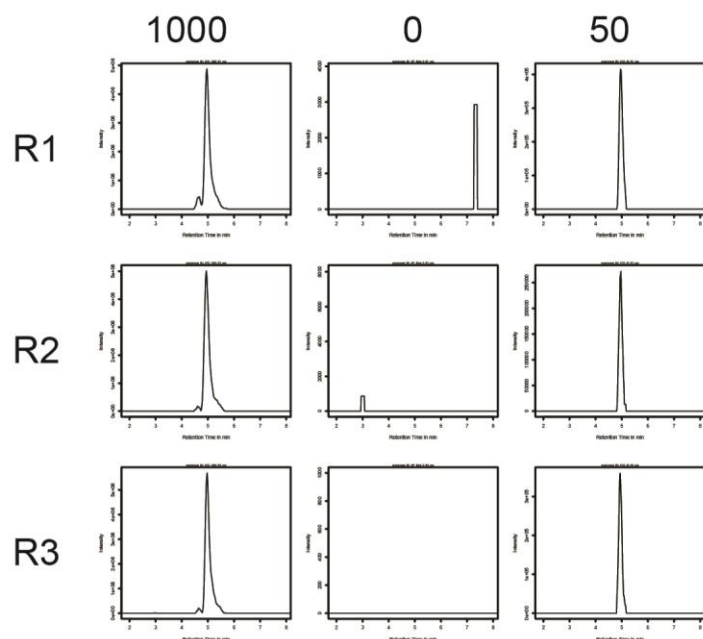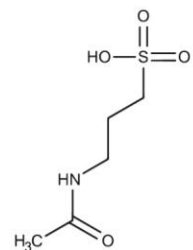

acamprosat  
logD -4.1, RT 4.9 min

## 7.2 Polar analyte exclusively amenable to enrichment by VEC from NPW and few matrices

### 1,3-propylenediaminotetraacetic acid

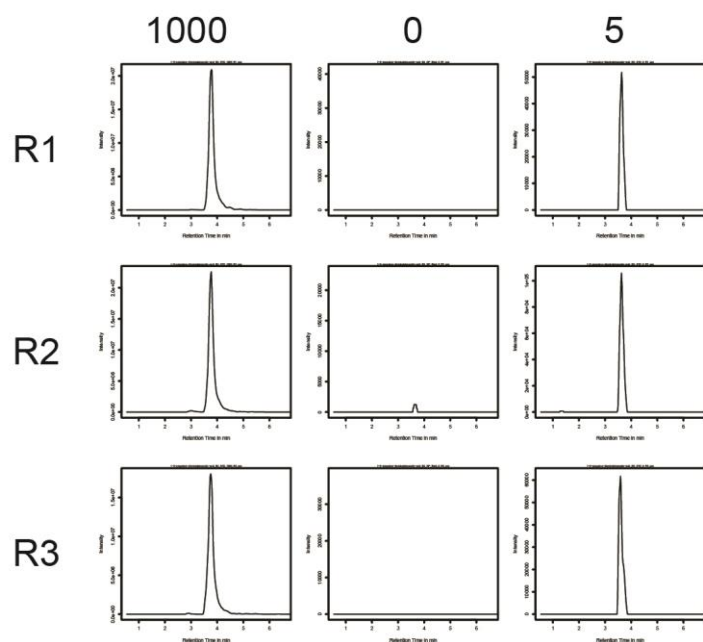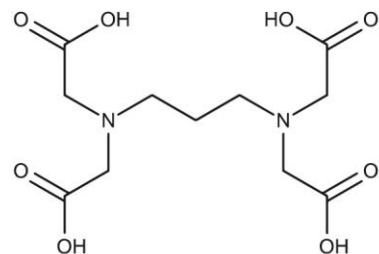

1,3-propylenediaminotetraacetic acid  
logD -14, RT 3.6 min

7.3 Polar analytes exclusively amenable to enrichment by VEC from all tested matrices

6-Aminopenicillanic acid

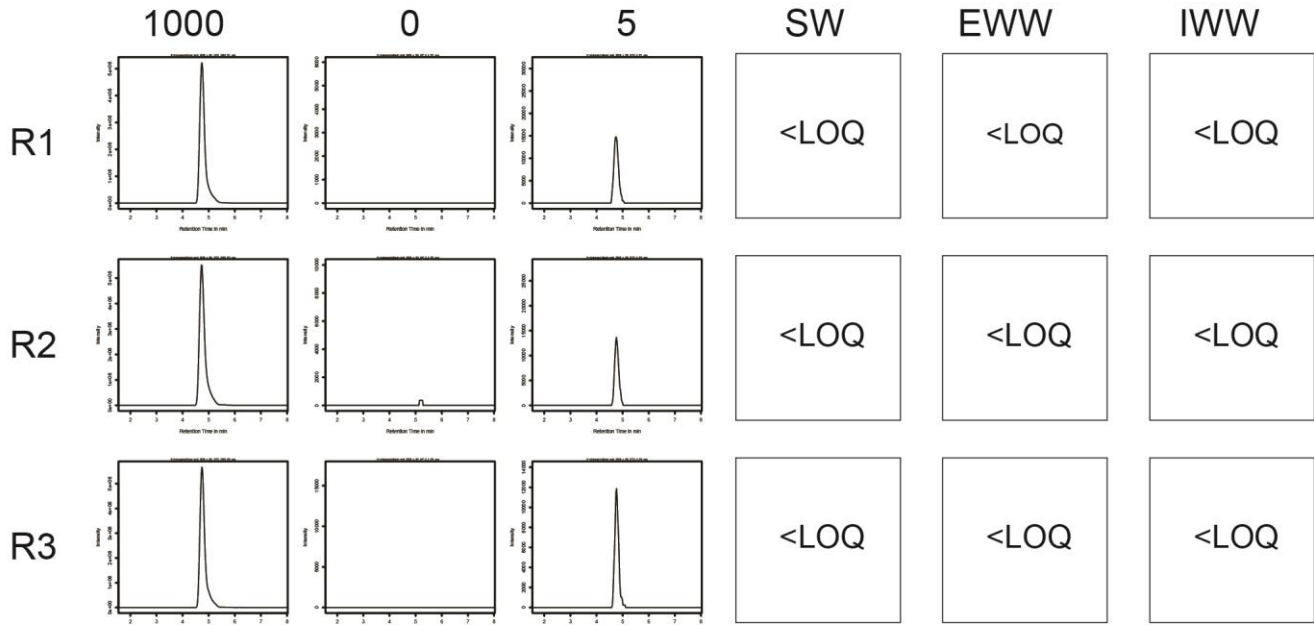

TRIS

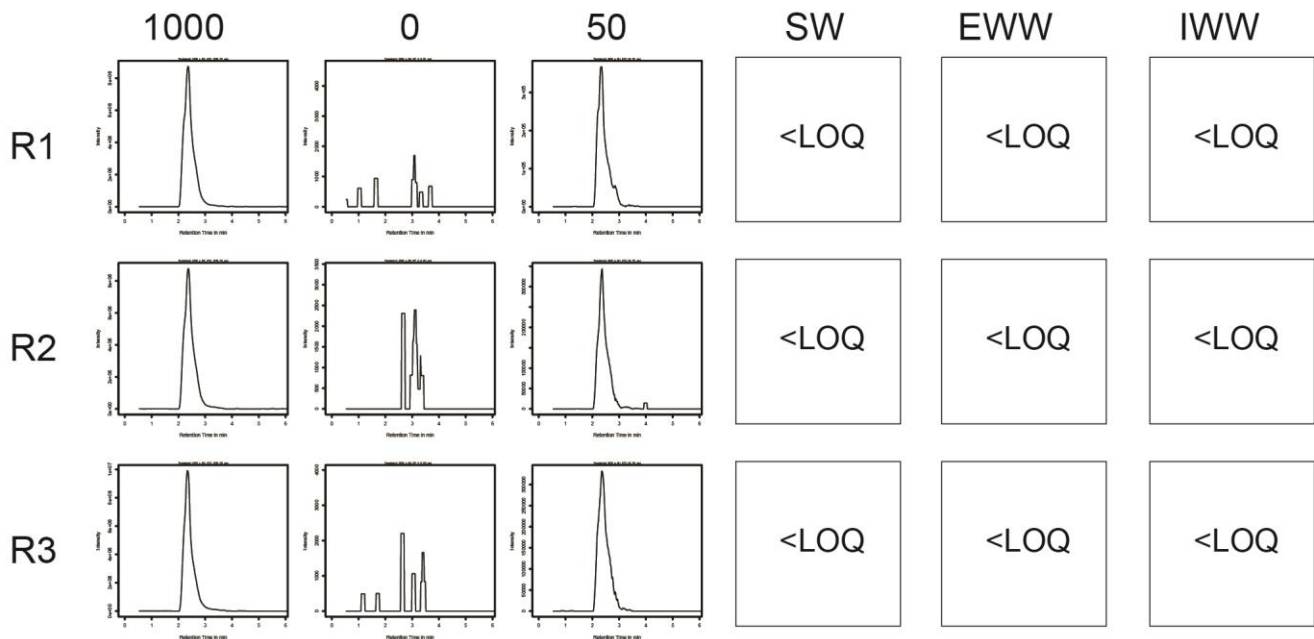

7.4 Polar analytes especially amenable to enrichment by VEC compared to SPE

1-Propanesulfonate

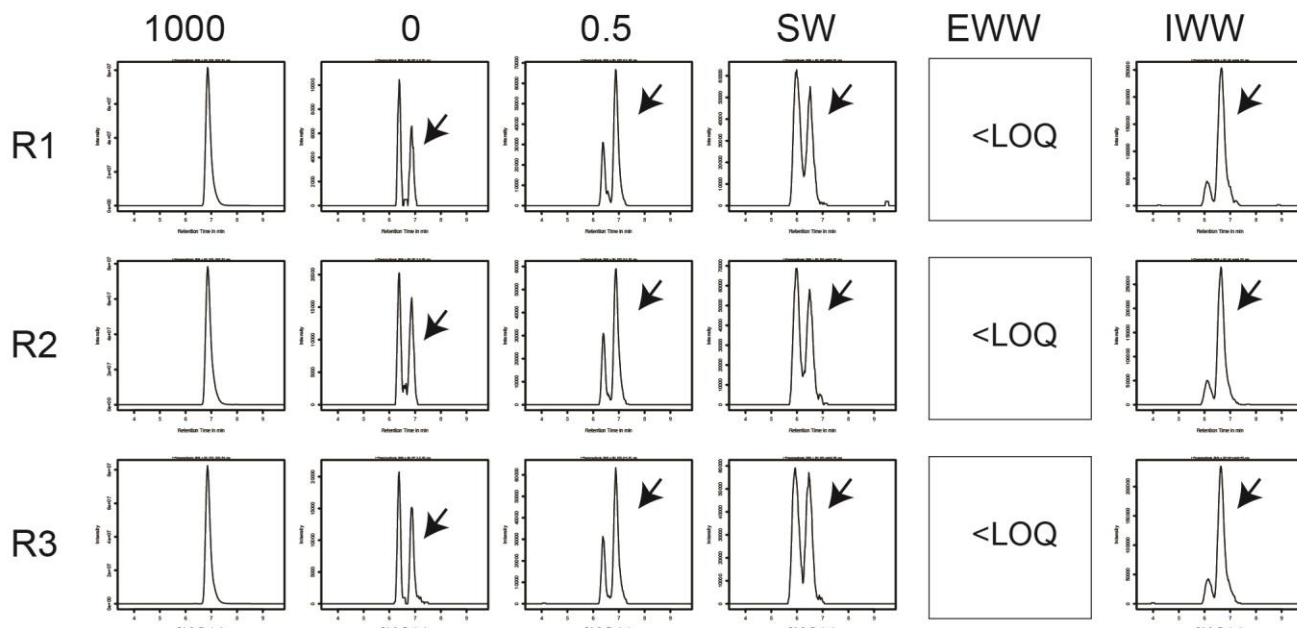

Sulfanilic acid

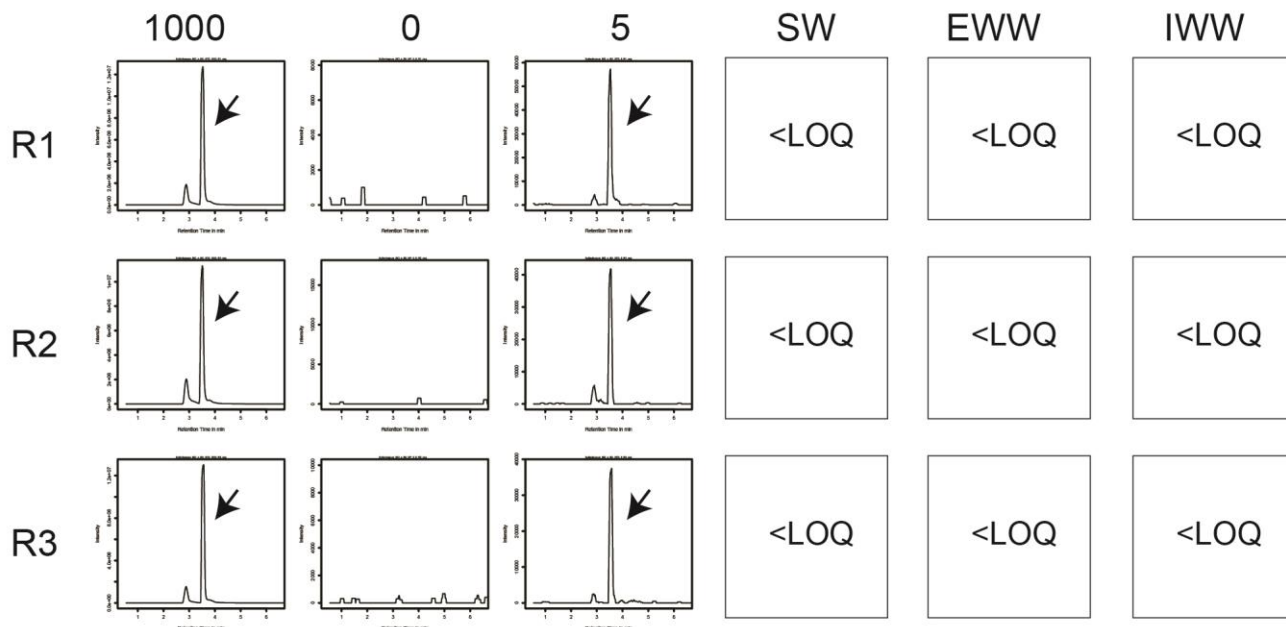

# 1-3-Dimethyl-2-imidazolidinone

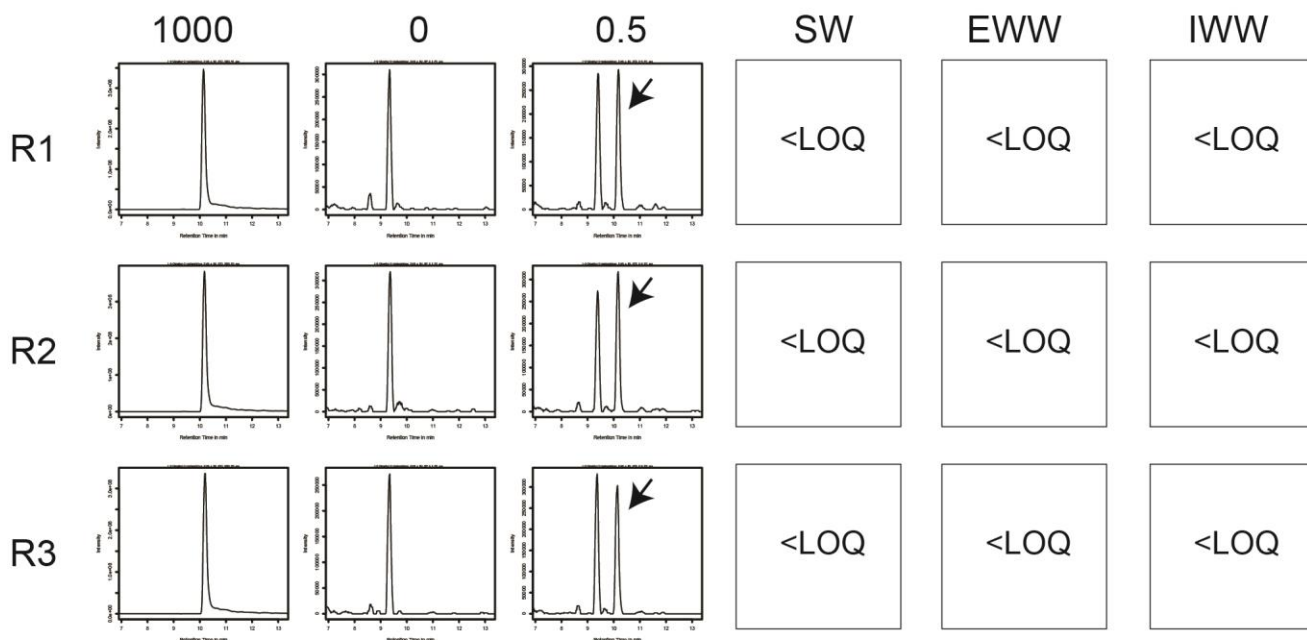

# Nicotine

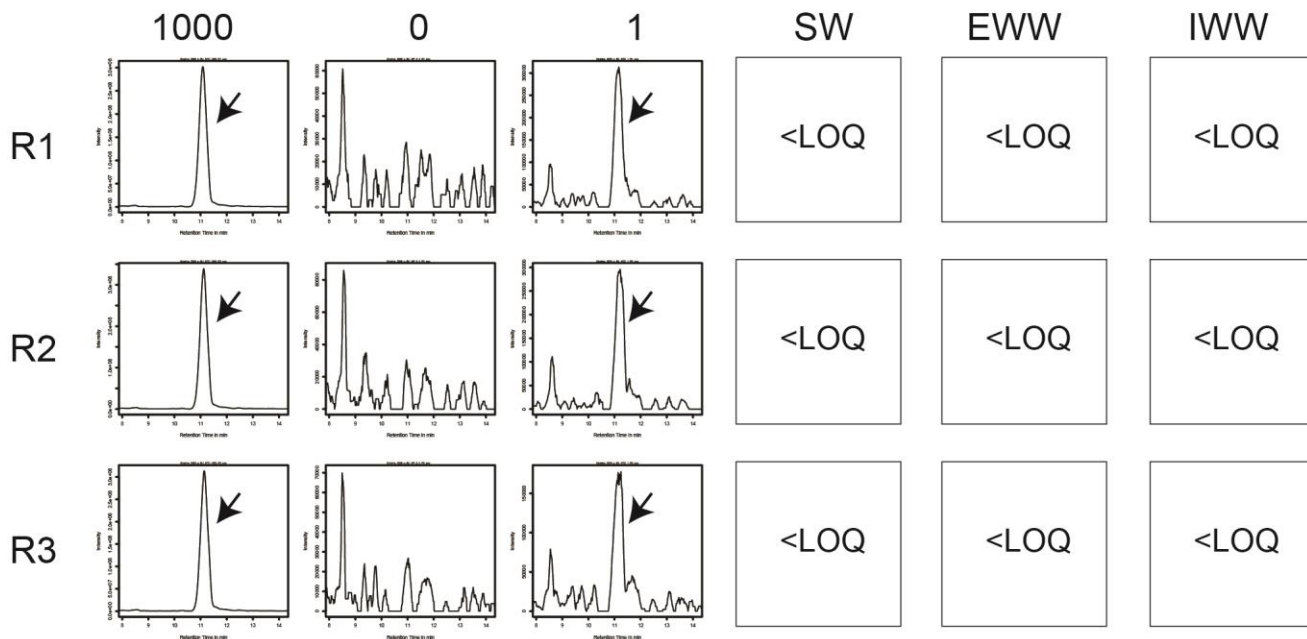

# Ranitidine

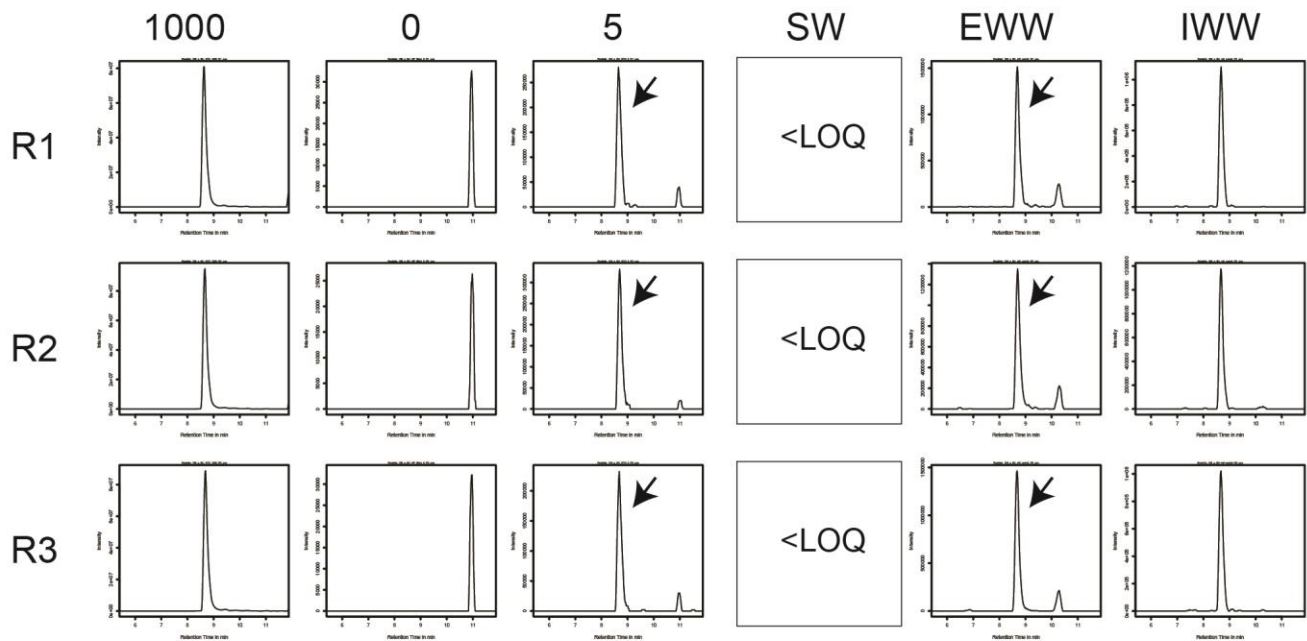

# N-(4-Aminophenyl)-N-methyl-acetamide

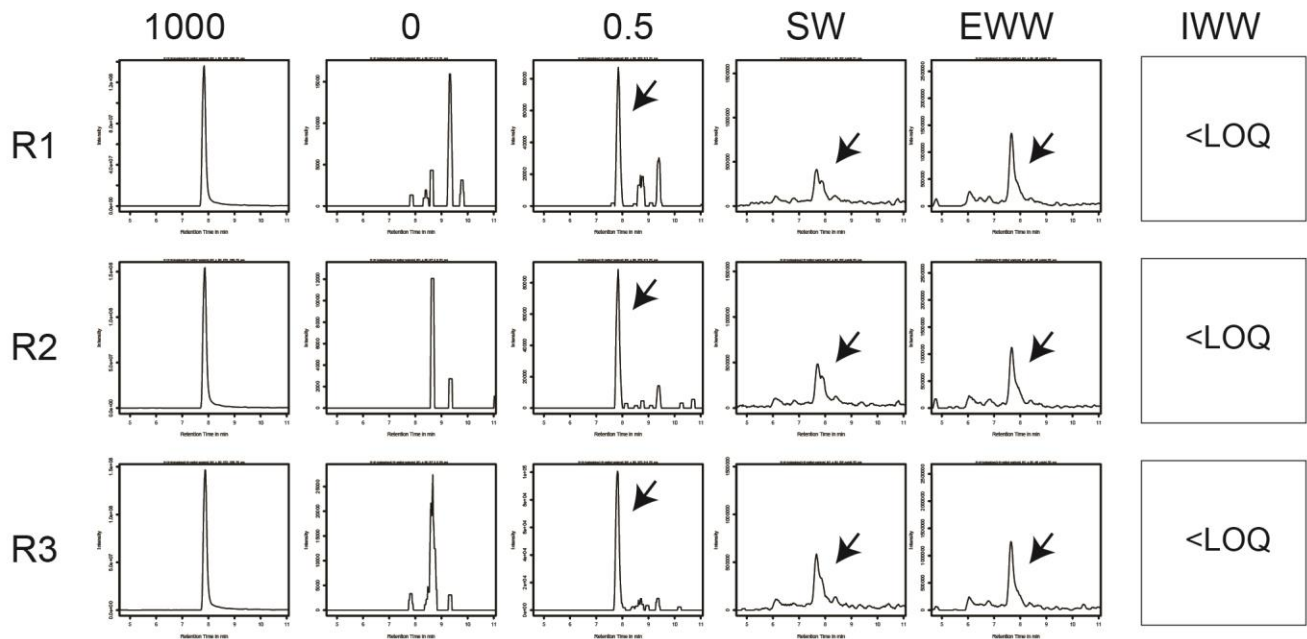

## 4-Aminopyrine (=4-Aminoantipyrine, 4-AA)

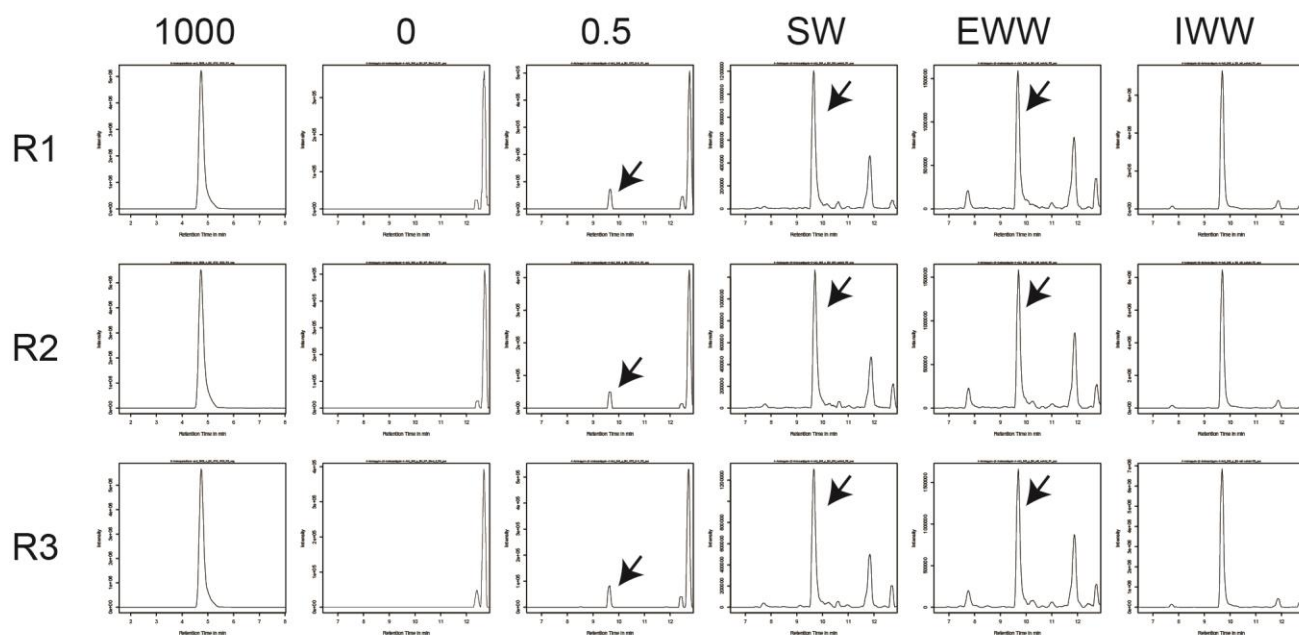

## N-(2-4-dimethylphenyl)-N-methylformamide

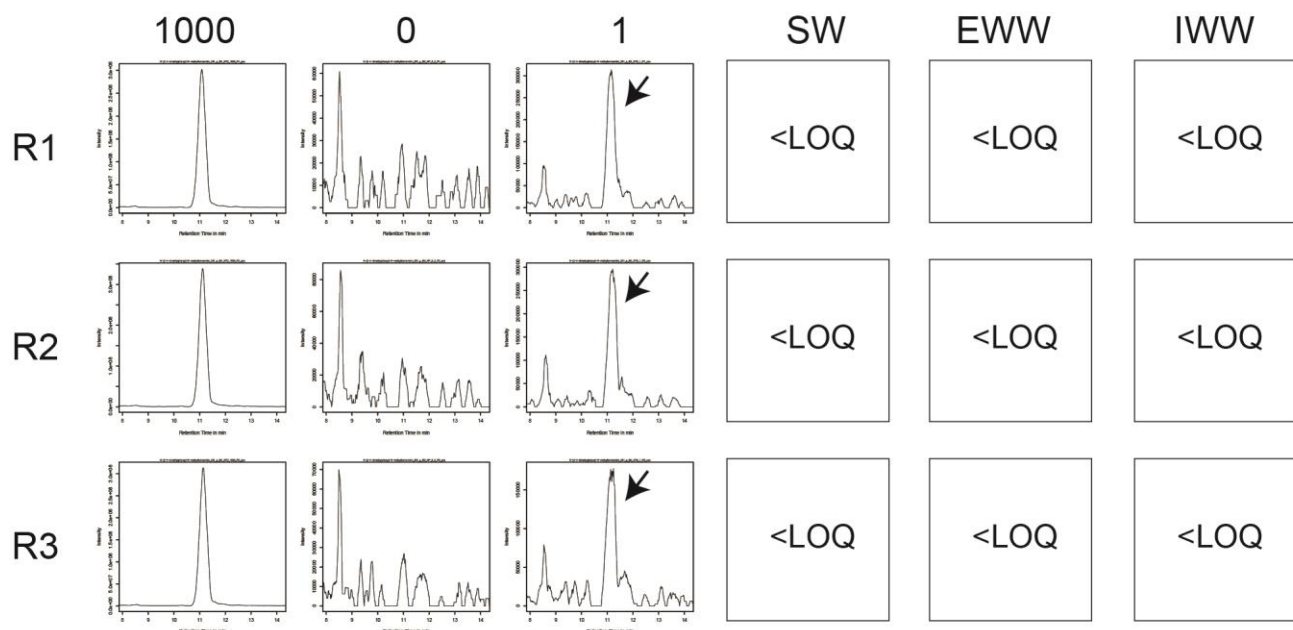

## References

1. BUCHI Labortechnik AG (2012) Syncore Application Guide, Version A.
